# Supplementary material
Source: Springer Nature journal article supplement (https://www.springermedizin.de/resource/supplementary/12893_2011_229_MOESM2_ESM.pdf/9511882)

posttest

Intervention OR

Control OR

95% CI Staffing Resources

3,0

2,8

2,6

pretest

posttest

pretest

posttest

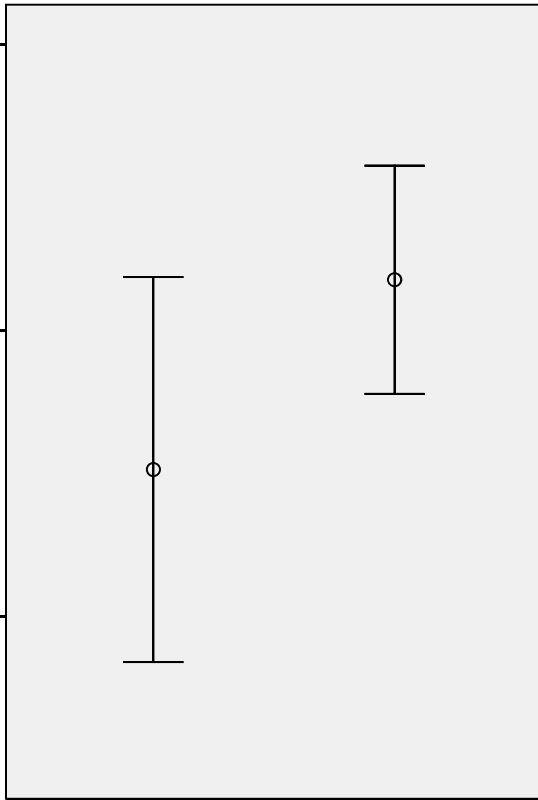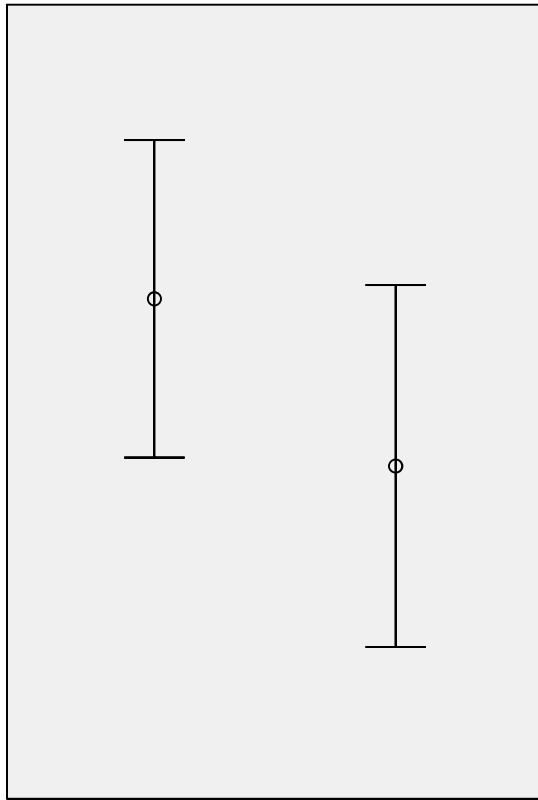

Supplement: MOESM2 [file 9511882]
